# Supplementary material for: Nevadensin relieves food allergic responses and passive cutaneous anaphylaxis in mice through inhibiting the expression of c-Kit receptors
Source: Royal Society of Chemistry journal article supplement (doi:10.1039/d0fo02398a), 2020-01-01

## Supplementary information

### Figure legends

#### Figure S1. Effects of NEV on the levels of specific antibodies and cytokines.

- A. The effect of daily treatment with NEV on serum OVA-specific IgG1 and IgG2a. Serum from eyeballs was collected on day 41.
- B. The effect of daily treatment with NEV on serum IL-4. Serum from eyeballs was collected on day 41.
- C. The effect of daily treatment with NEV on serum IFN- $\gamma$ . Serum from eyeballs was collected on day 41.
- D. The effect of daily treatment with NEV on serum IL-10. Serum from eyeballs was collected on day 41. <sup>#</sup> $P < 0.05$ , <sup>##</sup> $P < 0.01$  for the PBS group compared with the OVA group. The data represent the mean  $\pm$  SD.

Figure S1

**A**

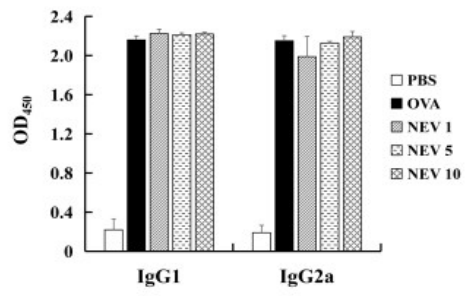

**B**

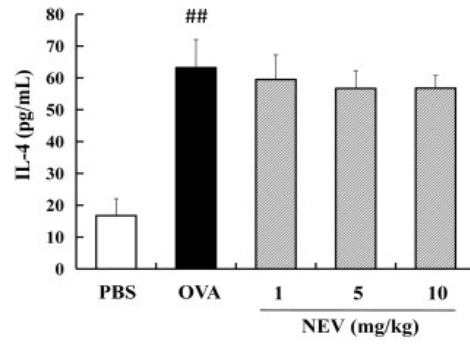

**C**

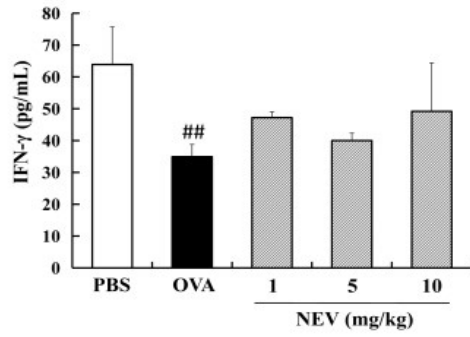

**D**

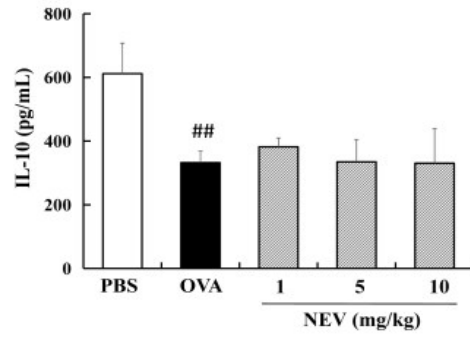

Supplement: d0fo02398a1.pdf [file d0fo02398a1.pdf]
